# Supplementary material
Source: PubMed Central journal article supplement (PMC1679788)

## SUPPLEMENTARY INFORMATION

TABLE 1

*S. pombe* strains used

|       |                                                                                         | Reference or source  |
|-------|-----------------------------------------------------------------------------------------|----------------------|
| P137  | <i>ade6-M216 leu1-32 ura4-D18 h<sup>+</sup></i>                                         |                      |
| P1262 | <i>cdt1-YFP::kanMX6 ade6-M210 leu1-32 ura4-D18 h<sup>-</sup></i>                        | (Gregan et al, 2003) |
| P1424 | <i>cdt1-18myc pat1-114</i>                                                              |                      |
| P1451 | <i>nda3-311 cdt1-18myc ura4-D18 leu1-32 h<sup>-</sup></i>                               |                      |
| P1452 | <i>nda3-311 cdc18-TAP::kanMX6 leu1-32 ura4-D18 h<sup>-</sup></i>                        | H. Nishitani         |
| P1517 | <i>cdt1-TAP::kanMX6 ade6-M210 ura4-D18 leu1-32 his3-D1 h<sup>+</sup></i>                | D. Hermand           |
| P1611 | <i>mts3-1 cdt1-TAP::kanMX6 h<sup>-</sup></i>                                            |                      |
| P1615 | <i>ddb1Δ::kan nda3-311 cdt1-18myc</i>                                                   | S. Linn              |
| P1623 | <i>cds1Δ::ura4<sup>+</sup> ura4-D18 nda3-311 cdt1-18myc</i>                             |                      |
| P1630 | <i>rad3Δ::ura4<sup>+</sup> ura4-D18 leu1-32 nda3-311 cdt1-18myc</i>                     |                      |
| P1636 | <i>mcm4-GFP::kanMX6 nda3-311 ura4-D18 leu1-32</i>                                       |                      |
| P1651 | <i>mcm4-GFP::kanMX6 nda3-311 ddb1Δ::kan cdt1-18myc ade6-210 leu1-32 ura4-D18</i>        |                      |
| P1673 | <i>cdt1-TAP::kanMX6 nda3-311 ddb1Δ::kan</i>                                             |                      |
| P1674 | <i>cdt2Δ::ura4<sup>+</sup> cdt1-YFP::kanMX6 ade6-704 leu1-32 ura4-D18 h<sup>-</sup></i> |                      |
| P1706 | <i>cdt2Δ::ura4<sup>+</sup> ura4-D18 nda3-311 cdt1-18myc</i>                             |                      |
| P1731 | <i>cdt2Δ::ura4<sup>+</sup> cdt1-TAP::kanMX6 leu1 ade6 ura4 h<sup>+</sup></i>            |                      |
| P1766 | <i>spd1-TAP leu1-32 ura4-D18 ade-704</i>                                                | T. Carr              |
| P1767 | <i>spd1-TAP ddb1Δ leu1-32 ura4-D18 ade-704</i>                                          | T. Carr              |
| P1768 | <i>spd1-TAP cdt2Δ leu1-32 ura4-D18 ade-704</i>                                          | T. Carr              |
| P1769 | <i>ddb1Δ::kan cdt1-YFP::kanMX6</i>                                                      |                      |
| P1783 | <i>cdt1-TAP::kanMX6 ade6-M210 ura4-D18 leu1-32 his3-D1 [pREP41X-His6Ub]</i>             |                      |
| P1785 | <i>cdt1-TAP::kanMX6 ura4-D18 leu1-32 cdt2Δ::ura4<sup>+</sup> [pREP41X-His6Ub]</i>       |                      |

## SUPPLEMENTARY FIGURE LEGENDS

Fig. S1

### **Deletion of *ddb1* does not advance the timing of Mcm4 chromatin binding after UV treatment.**

- A. P1636 (*ddb1*<sup>+</sup> *nda3-311*) cells were arrested at 20°C, UV treated (100 J/m<sup>2</sup>) and then released to 32°C. Timing of Mcm4-GFP chromatin binding was analysed using in situ chromatin binding assay. Detergent-extracted cells are shown. Scale bar: 10µm.
- B. Timing of anaphase shown as the mean percentage of cells with 2 nuclei from 3 independent repeats of the experiment shown in panel A.
- C. Number of cells with chromatin bound Mcm4 shown as the mean percentage from 3 independent repeats of the experiment shown in A.
- D. Chromatin binding of Mcm4-GFP in P1651 (*ddb1*Δ *nda3-311*) cells treated as in A.
- E. Timing of anaphase shown as the mean percentage of cells with 2 nuclei from 2 independent repeats of the experiment shown in panel D.
- F. Number of cells with chromatin bound Mcm4 shown as the mean percentage from 2 independent repeats of the experiment shown in D.

Fig. S2

**Appearance of a Cdt1 ladder after UV treatment in wild-type but not *ddb1* $\Delta$  cells.**

Experimental procedure was as in Fig 3C, using strains P1451 and P1615. The western blot was over exposed to detect the higher molecular weight Cdt1 ladder that probably represents Cdt1-ubiquitin conjugates.

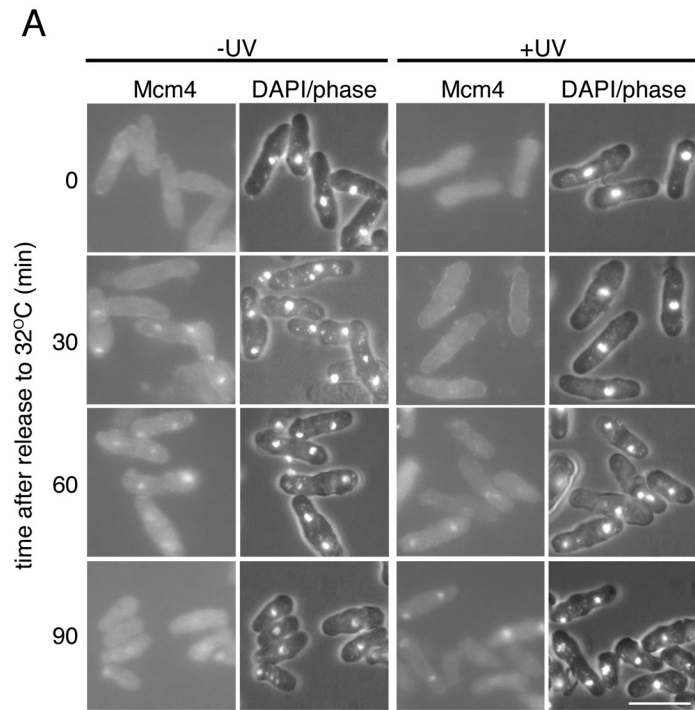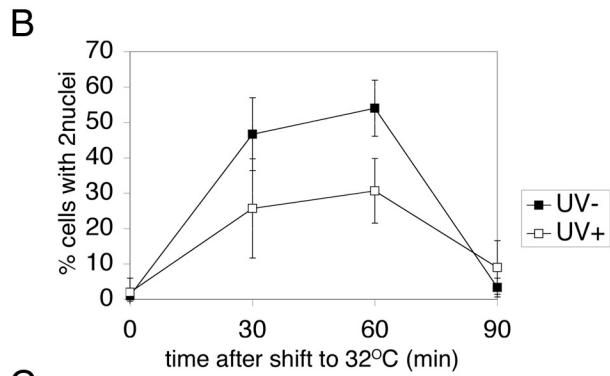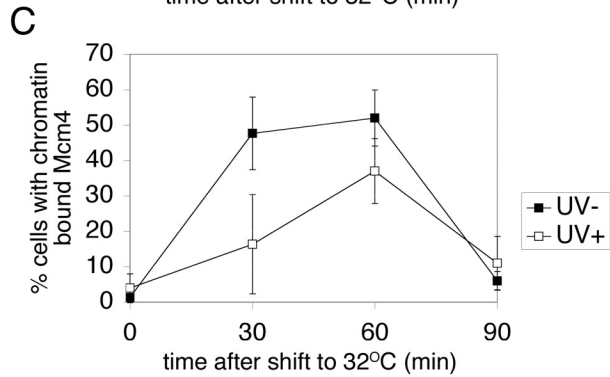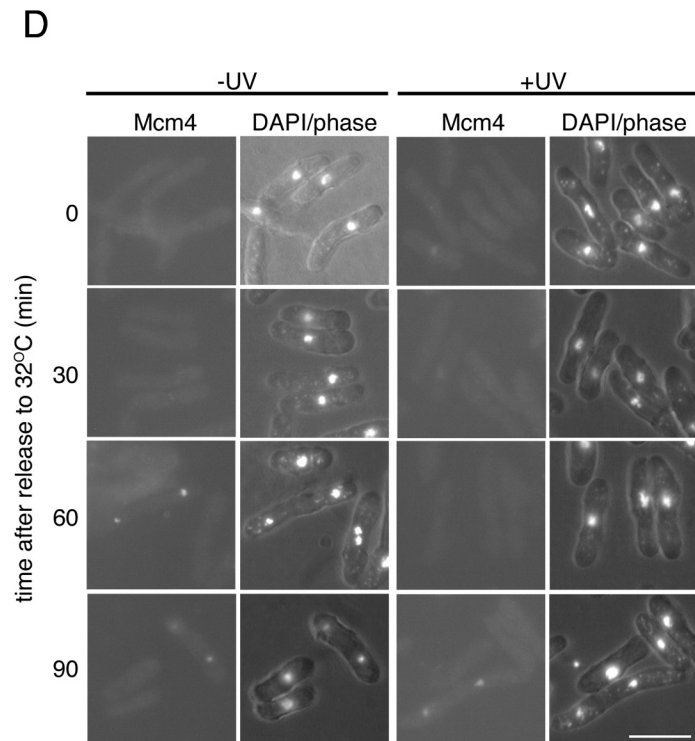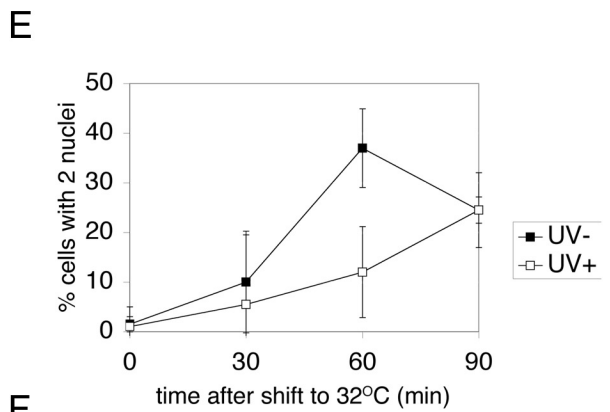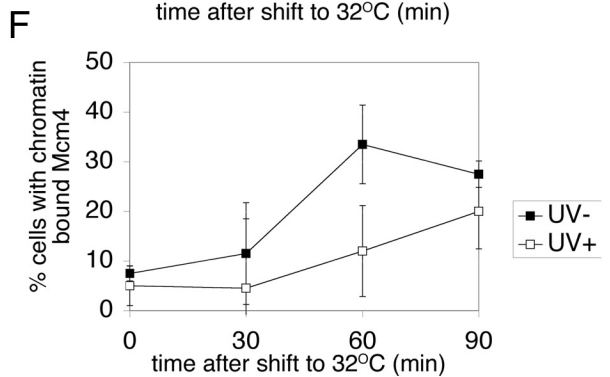

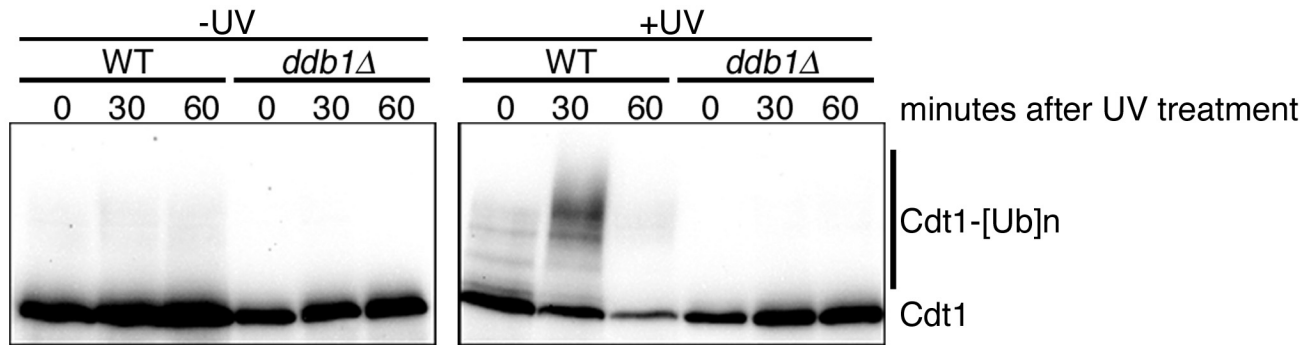

Supplement: 7400827-s1.pdf [file 7400827-s1.pdf]
